# Supplementary material
Source: MDPI journal article supplement (https://www.mdpi.com/2073-4395/12/6/1437)
Supplement: s1 [file s1]

**Table S1.** Fertilization situation in first experiment

| Code | Treatment               | Mineral fertilizer       |                                                      |                                         | Bio-organic fertilizer      |                             |                                  |                                    |
|------|-------------------------|--------------------------|------------------------------------------------------|-----------------------------------------|-----------------------------|-----------------------------|----------------------------------|------------------------------------|
|      |                         | N<br>kg·ha <sup>-1</sup> | P <sub>2</sub> O <sub>5</sub><br>kg·ha <sup>-1</sup> | K <sub>2</sub> O<br>kg·ha <sup>-1</sup> | No.1<br>kg·ha <sup>-1</sup> | Seek<br>kg·ha <sup>-1</sup> | Jiajiapei<br>kg·ha <sup>-1</sup> | Fulvic Acid<br>kg·ha <sup>-1</sup> |
| CK   | no fertilizer           | —                        | —                                                    | —                                       | —                           | —                           | —                                | —                                  |
| T1   | conventional fertilizer | 193.2                    | 135                                                  | 135                                     | —                           | —                           | —                                | —                                  |
| T2   | -N20%                   | 154.5                    | 135                                                  | 135                                     | —                           | —                           | —                                | —                                  |
| N1   | -N20%+NO.1              | 132                      | 97.5                                                 | 130                                     | 750                         | —                           | —                                | —                                  |
| N2   | -N20%+NO.1              | 109.5                    | 60                                                   | 125                                     | 1500                        | —                           | —                                | —                                  |
| N3   | -N20%+NO.1              | 64.5                     | 22.5                                                 | 120                                     | 3000                        | —                           | —                                | —                                  |
| S1   | -N20%+Seek              | 132                      | 97.5                                                 | 130                                     | —                           | 750                         | —                                | —                                  |
| S2   | -N20%+Seek              | 109.5                    | 60                                                   | 125                                     | —                           | 1500                        | —                                | —                                  |
| S3   | -N20%+Seek              | 64.5                     | 22.5                                                 | 120                                     | —                           | 3000                        | —                                | —                                  |
| J1   | -N20%+Jiajiapei         | 147.3                    | 127.8                                                | 131.4                                   | —                           | —                           | 360                              | —                                  |
| J2   | -N20%+Jiajiapei         | 140.1                    | 120.6                                                | 127.8                                   | —                           | —                           | 720                              | —                                  |
| J3   | -N20%+Jiajiapei         | 125.7                    | 112.8                                                | 124.2                                   | —                           | —                           | 1440                             | —                                  |
| F1   | N20%+Fulvic acid        | 138                      | 112.5                                                | 127.5                                   | —                           | —                           | —                                | 750                                |
| F2   | -N20%+Fulvic acid       | 108                      | 90                                                   | 120                                     | —                           | —                           | —                                | 1500                               |
| F3   | -N20%+Fulvic acid       | 84                       | 67.5                                                 | 112.5                                   | —                           | —                           | —                                | 3000                               |
| T3   | -N30%                   | 135.2                    | 135                                                  | 135                                     | —                           | —                           | —                                | —                                  |
| n1   | -N30%+NO.1              | 112.7                    | 97.5                                                 | 130                                     | 750                         | —                           | —                                | —                                  |
| n2   | -N30%+NO.1              | 90.2                     | 60                                                   | 125                                     | 1500                        | —                           | —                                | —                                  |
| n3   | -N30%+NO.1              | 45.2                     | 22.5                                                 | 120                                     | 3000                        | —                           | —                                | —                                  |
| s1   | -N30%+Seek              | 123                      | 97.5                                                 | 130                                     | —                           | 750                         | —                                | —                                  |
| s2   | -N30%+Seek              | 94.5                     | 60                                                   | 125                                     | —                           | 1500                        | —                                | —                                  |
| s3   | -N30%+Seek              | 66                       | 22.5                                                 | 120                                     | —                           | 3000                        | —                                | —                                  |
| j1   | -N30%+Jiajiapei         | 128                      | 127.8                                                | 131.4                                   | —                           | —                           | 360                              | —                                  |
| j2   | -N30%+Jiajiapei         | 120.8                    | 120.6                                                | 127.8                                   | —                           | —                           | 720                              | —                                  |
| j3   | -N30%+Jiajiapei         | 113.6                    | 112.8                                                | 124.2                                   | —                           | —                           | 1440                             | —                                  |
| f1   | -N30%+Fulvic acid       | 123                      | 112.5                                                | 127.5                                   | —                           | —                           | —                                | 750                                |
| f2   | -N30%+Fulvic acid       | 94.5                     | 90                                                   | 120                                     | —                           | —                           | —                                | 1500                               |
| f3   | -N30%+Fulvic acid       | 66                       | 67.5                                                 | 112.5                                   | —                           | —                           | —                                | 3000                               |

**Table S2.** Information of primers used in this study

|          | Primers   | Primer sequence<br>(5' - 3')         | Target<br>gene | Target<br>subfrag<br>ment | Subfragm<br>ent length<br>(bp) | PCR reaction<br>condition                                                                                                                                                                                    |
|----------|-----------|--------------------------------------|----------------|---------------------------|--------------------------------|--------------------------------------------------------------------------------------------------------------------------------------------------------------------------------------------------------------|
| Bacteria | FW-F515   | GTGCCAGC(A/C)GCCGCGGTA<br>A          | 16S            | V4                        | 291                            | an initial denaturation at 95 °C for 3 minutes, followed by 27 cycles of 30 s at 95 °C, annealing for 30 s at 55 °C and elongation for 45 s at 72 °C, the last step being extension at 72 °C for 10 minutes. |
|          | REV-R806  | GGACTAC(G/A/C)(G/C)GGGTA<br>TCTAAT   |                |                           |                                |                                                                                                                                                                                                              |
| Fungi    | FW-F817   | TTAGCATGGA<br>ATAAT(A/G)(A/G)AATAGGA | 18S            | V5-V7                     | 379                            | an initial denaturation at 95 °C for 3 minutes, followed by 35 cycles of 30 s at 95 °C, annealing for 30 s at 55 °C and elongation for 45 s at 72 °C, the last step being extension at 72 °C for 10 minutes  |
|          | REV-R1196 | TCTGGACCTG<br>GTGAGTTTCC             |                |                           |                                |                                                                                                                                                                                                              |

**Table S3.** Effect of nitrogen reduction by 20% combined with bio-organic fertilizer on five elements in soil of cabbage

| Treatments | P<br>$\mu\text{g}\cdot\text{g}^{-1}$ | K<br>$\mu\text{g}\cdot\text{g}^{-1}$ | Ca<br>$\mu\text{g}\cdot\text{g}^{-1}$ | Zn<br>$\mu\text{g}\cdot\text{g}^{-1}$ |
|------------|--------------------------------------|--------------------------------------|---------------------------------------|---------------------------------------|
| CK         | 17.49±0.48b                          | 56.58±1.59b                          | 40.07±1.65c                           | 0.28±0.01b                            |
| T1         | 19.65±0.48ab                         | 61.35±1.06ab                         | 47.17±1.41abc                         | 0.34±0.01ab                           |
| T2         | 20.42±1.02a                          | 62.81±3.10ab                         | 46.14±4.57abc                         | 0.31±0.08ab                           |
| N1         | 19.87±0.33a                          | 61.86±1.22ab                         | 46.38±1.37abc                         | 0.27±0.01b                            |
| N2         | 20.61±0.29a                          | 67.76±2.31a                          | 51.84±1.05a                           | 0.34±0.02ab                           |
| N3         | 19.70±0.46ab                         | 65.92±0.70a                          | 45.44±0.88abc                         | 0.28±0.04b                            |
| S1         | 19.79±0.41a                          | 65.17±3.31ab                         | 46.71±1.61abc                         | 0.44±0.10a                            |
| S2         | 19.34±0.46ab                         | 67.57±0.65a                          | 41.07±0.65c                           | 0.27±0.01b                            |
| S3         | 17.99±0.58b                          | 67.08±0.39a                          | 44.72±1.66abc                         | 0.27±0.01b                            |
| J1         | 20.35±0.45a                          | 61.59±1.08ab                         | 45.95±0.25abc                         | 0.33±0.02ab                           |
| J2         | 20.28±0.66a                          | 58.78±2.59b                          | 48.61±1.21ab                          | 0.31±0.01ab                           |
| J3         | 19.18±0.20ab                         | 60.90±3.40ab                         | 42.73±0.85bc                          | 0.25±0.02b                            |

**Table S4.** Effects of different fertilization with nitrogen reduced 20% treatments on photosynthetic characteristics of cabbage

| Treatments | $P_n$<br>$\mu\text{mol}\cdot\text{m}^{-2}\cdot\text{s}^{-1}$ | $G_s$<br>$\text{mmol}\cdot\text{m}^{-2}\cdot\text{s}^{-1}$ | $C_i$<br>$\mu\text{mol}\cdot\text{mol}^{-1}$ | $T_r$<br>$\text{mmol}\cdot\text{m}^{-2}\cdot\text{s}^{-1}$ |
|------------|--------------------------------------------------------------|------------------------------------------------------------|----------------------------------------------|------------------------------------------------------------|
| CK         | 15.27±0.45e                                                  | 0.28±0.05c                                                 | 197.28±9.40cd                                | 3.44±0.16c                                                 |
| T1         | 18.79±0.64cd                                                 | 0.46±0.02ab                                                | 223.72±7.41ab                                | 4.57±0.16ab                                                |
| T2         | 15.80±0.11e                                                  | 0.29±0.0c                                                  | 193.85±067d                                  | 3.33±0.03c                                                 |
| N1         | 21.28±0.65bc                                                 | 0.45±10.07ab                                               | 216.27±5.63bc                                | 5.14±0.32a                                                 |
| N2         | 21.99±0.81bc                                                 | 0.40±0.03ab                                                | 210.32±2.01bc                                | 4.57±0.10ab                                                |
| N3         | 17.51±0.86de                                                 | 0.47±0.03a                                                 | 220.65±3.51ab                                | 3.37±0.12c                                                 |
| S1         | 19.57±0.58bcd                                                | 0.50±0.03a                                                 | 235.03±3.57a                                 | 4.59±0.13ab                                                |
| S2         | 20.81±0.67bc                                                 | 0.44±0.05ab                                                | 216.78±5.06bc                                | 4.97±0.25a                                                 |
| S3         | 18.26±0.66cd                                                 | 0.30±0.01c                                                 | 196.79±1.81cd                                | 3.78±0.13c                                                 |
| J1         | 20.55±0.92bc                                                 | 0.34±0.03bc                                                | 202.09±2.47cd                                | 3.76±0.36c                                                 |
| J2         | 23.51±0.33a                                                  | 0.47±0.01a                                                 | 216.56±0.99bc                                | 5.20±0.10a                                                 |
| J3         | 20.32±1.18bc                                                 | 0.30±0.05c                                                 | 211.72±2.00bc                                | 3.97±0.45bc                                                |

**Table S5.** Effects of different fertilization with nitrogen reduced 20% treatments on growth of cabbage

| Treatments | Plant height (cm) | Leaf length (cm) | Leaf width (cm) | Crown length (cm) | Crown width (cm) |
|------------|-------------------|------------------|-----------------|-------------------|------------------|
| CK         | 19.17±0.17d       | 21.33±1.45bc     | 14.33±0.42c     | 29.83±0.54c       | 26.67±1.05 c     |
| T1         | 21.33±0.61abc     | 24.00±0.73a      | 18.33±0.42a     | 33.83±0.70a       | 31.83±0.65a      |
| T3         | 22.67±0.71ab      | 22.00±0.45bc     | 18.50±0.67a     | 32.67±0.21ab      | 30.33±1.23ab     |
| N1         | 23.25±0.63ab      | 25.40±0.51a      | 17.80±0.20ab    | 34.00±0.37a       | 32.00±0.32a      |
| N2         | 22.50±1.06ab      | 23.83±1.19abc    | 18.00±0.37ab    | 34.17±0.60a       | 30.67±1.69ab     |
| N3         | 22.50±0.43ab      | 22.00±0.58bc     | 17.33±0.33ab    | 31.83±0.70abc     | 29.83±0.70ab     |
| S1         | 22.00±0.52abc     | 23.00±0.63bc     | 17.33±0.49ab    | 33.50±0.50ab      | 30.50±0.56ab     |
| S2         | 23.17±1.22ab      | 23.33±1.05abc    | 18.00±0.52ab    | 33.83±1.70a       | 32.33±1.65a      |
| S3         | 21.00±0.26bcd     | 21.17±0.48c      | 17.33±0.42ab    | 32.50±1.31ab      | 30.33±0.92ab     |
| J1         | 23.50±1.26a       | 23.17±1.08abc    | 17.83±0.48ab    | 32.83±0.95ab      | 30.50±1.12ab     |
| J2         | 22.17±0.17abc     | 23.00±0.37abc    | 18.00±0.26ab    | 33.67±0.61a       | 31.00±0.77ab     |
| J3         | 20.00±0.30cd      | 21.50±0.67bc     | 16.67±0.33b     | 31.67±0.76abc     | 28.50±0.43b      |
| F1         | 21.67±0.76abc     | 23.00±0.63abc    | 17.33±0.49ab    | 33.00±0.82ab      | 30.33±0.67ab     |
| F2         | 20.00±0.45cd      | 21.17±0.54c      | 16.67±0.33b     | 30.83±0.40ab      | 28.50±0.34b      |
| F3         | 21.83±0.40abc     | 23.00±0.77abc    | 17.33±0.33ab    | 33.00±0.82bc      | 30.17±0.48ab     |

**Table S6.** Effects of different fertilization with nitrogen reduced 30% treatments on growth of cabbage

| Treatments | Plant height (cm) | Leaf length (cm) | Leaf width (cm) | Crown length (cm) | Crown width (cm) |
|------------|-------------------|------------------|-----------------|-------------------|------------------|
| CK         | 19.17±0.17d       | 21.33±1.45c      | 14.33±0.42c     | 29.83±0.54d       | 26.67±1.05c      |
| T1         | 21.33±abc         | 24.00±0.73a      | 18.33±0.42a     | 33.83±0.70abcd    | 31.83±0.65a      |
| T3         | 20.83±abcd        | 21.00±0.77c      | 16.67±0.33b     | 30.83±0.70bcd     | 29.83±0.75ab     |
| n1         | 20.17±bcd         | 21.83±0.70b      | 16.83±0.40a     | 31.33±0.49abcd    | 28.50±0.43bc     |
| n2         | 20.33±bcd         | 22.00±0.52c      | 17.67±0.56a     | 31.83±0.40abcd    | 29.17±0.31abc    |
| n3         | 20.67±abcd        | 21.67±0.61b      | 17.00±0.58a     | 31.17±0.48bcde    | 28.00±0.63bc     |
| s1         | 22.33±a           | 24.50±0.99a      | 17.17±0.48a     | 32.83±1.01abcd    | 29.33±1.45abc    |
| s2         | 21.83±abc         | 22.00±0.58b      | 17.33±0.92a     | 32.67±0.95abcd    | 29.50±1.18abc    |
| s3         | 21.33±abc         | 22.33±0.71a      | 17.17±0.31a     | 33.67±1.28abcd    | 29.33±0.88abc    |
| j1         | 21.67±abc         | 22.00±0.58b      | 17.17±0.48a     | 31.67±0.88abcd    | 29.83±0.31ab     |
| j2         | 20.00±bcd         | 21.83±0.65b      | 17.00±0.37a     | 30.17±1.14cd      | 28.67±0.61bc     |
| j3         | 20.50±abcd        | 21.67±0.42b      | 17.00±0.37a     | 32.33±0.67abcd    | 29.50±0.43abc    |
| f1         | 22.33±a           | 22.33±0.33a      | 16.83±0.48a     | 31.33±0.49abcd    | 28.83±0.40abc    |
| f2         | 20.33±bcd         | 22.00±0.77b      | 17.00±0.37a     | 31.83±0.40abcd    | 27.33±2.08bc     |
| f3         | 19.67±cd          | 21.50±0.50b      | 16.50±0.43a     | 31.83±0.60abcd    | 29.17±0.79abc    |

**Table S7.** Effects of bio-organic fertilizer with nitrogen reduction on soil element content of non-heading Chinese cabbage

| Treatments | P<br>$\mu\text{g}\cdot\text{g}^{-1}$ | K<br>$\mu\text{g}\cdot\text{g}^{-1}$ | Ca<br>$\mu\text{g}\cdot\text{g}^{-1}$ | Zn<br>$\mu\text{g}\cdot\text{g}^{-1}$ |
|------------|--------------------------------------|--------------------------------------|---------------------------------------|---------------------------------------|
| CK         | 20.03±0.26a                          | 61.39±3.14ab                         | 46.99±0.31a                           | 0.48±0.04a                            |
| T1         | 19.40±0.48ab                         | 65.42±3.73a                          | 45.73±1.59ab                          | 0.56±0.1a                             |
| T2         | 19.88±0.23a                          | 64.95±1.18a                          | 45.74±0.65ab                          | 0.42±0.02abc                          |
| N2         | 21.71±0.27a                          | 58.49±1.03ab                         | 47.83±1.17a                           | 0.43±0.01ab                           |
| S2         | 18.47±0.50b                          | 61.88±1.69ab                         | 42.83±1b                              | 0.31±0.02bc                           |
| J2         | 18.94±0.32ab                         | 56.43±1.97b                          | 43.35±1.51b                           | 0.27±0.03c                            |

**Table S8.** Effects of bio-organic fertilizer with nitrogen reduction on element content of the plant

| Treatments | P<br>$\mu\text{g}\cdot\text{g}^{-1}$ | K<br>$\mu\text{g}\cdot\text{g}^{-1}$ | Ca<br>$\mu\text{g}\cdot\text{g}^{-1}$ | Zn<br>$\mu\text{g}\cdot\text{g}^{-1}$ |
|------------|--------------------------------------|--------------------------------------|---------------------------------------|---------------------------------------|
| CK         | 38.20±0.43a                          | 213.98±1.58d                         | 64.18±1.41e                           | 0.09±0.01cd                           |
| T1         | 32.17±0.26b                          | 247.61±7.09c                         | 80.25±1.61b                           | 0.17±0.04 b                           |
| T2         | 31.10±0.58b                          | 279.71±5.66b                         | 79.27±1.70b                           | 0.10±0.01bcd                          |
| N2         | 27.06±0.36c                          | 309.90±9.13a                         | 69.28±0.69d                           | 0.28±0.03a                            |
| S2         | 33.80±0.32b                          | 296.61±13.46ab                       | 73.84±0.94c                           | 0.15±0.03bc                           |
| J2         | 28.08±0.25c                          | 282.58±10.75b                        | 92.14±1.72a                           | 0.10±0.01bcd                          |

**Table S9.** Effect of different fertilizer treatments on bacterial, fungi, protist *Alpha* diversity indexes of soil

|           | Treatment | Sobs            | Shannon     | Simpson       | Ace             |
|-----------|-----------|-----------------|-------------|---------------|-----------------|
| Bacterial | CK        | 1832.67±300.01a | 6.15±0.56a  | 0.006±0.001b  | 2490.69±321.41a |
|           | T1        | 1667.67±280.20a | 5.93±0.44ab | 0.008±ab      | 2312.25±400.21a |
|           | T2        | 1619.33±160.54a | 5.74±0.65ab | 0.012±0.001a  | 2283.51±254.87a |
|           | N2        | 1790.67±80.20a  | 6.05±0.24b  | 0.007±0.001ab | 2458.22±250.10a |
|           | S2        | 1745.00±298.01a | 5.98±0.57ab | 0.007±0.001ab | 2422.26±150.21a |
| Fungi     | CK        | 470.67±45.21a   | 6.15±0.48a  | 0.07±0.01b    | 565.12±80.98a   |
|           | T1        | 475.67±23.86a   | 5.93±0.54a  | 0.08±0.01ab   | 551.89±67.21a   |
|           | T2        | 379.33±30.21a   | 5.74±0.41a  | 0.15±0.02a    | 528.23±54.03a   |
|           | N2        | 444.33±32.04a   | 6.05±0.21a  | 0.08±0.01ab   | 514.56±41.02a   |
|           | S2        | 460.00±18.54a   | 5.98±0.24a  | 0.10±0.01ab   | 550.17±42.54a   |

**Table S10.** Effects of bio-organic fertilizer with nitrogen reduction on photosynthetic characteristics of the cabbage

| Treatments | <i>Pn</i><br>( $\mu\text{mol}\cdot\text{m}^{-2}\cdot\text{s}^{-1}$ ) | <i>Gs</i><br>( $\text{mmol}\cdot\text{m}^{-2}\cdot\text{s}^{-1}$ ) | <i>Ci</i><br>( $\mu\text{mol}\cdot\text{mol}^{-1}$ ) | <i>Tr</i><br>( $\text{mmol}\cdot\text{m}^{-2}\cdot\text{s}^{-1}$ ) |
|------------|----------------------------------------------------------------------|--------------------------------------------------------------------|------------------------------------------------------|--------------------------------------------------------------------|
| CK         | 21.25±0.60bc                                                         | 0.40±0.04b                                                         | 270.67±7.51c                                         | 5.62±0.31b                                                         |
| T1         | 22.86±1.46ab                                                         | 0.54±0.06b                                                         | 285.07±7.48ab                                        | 6.32±0.24b                                                         |
| T2         | 22.14±28bc                                                           | 0.48±0.03b                                                         | 283.80±7.81ab                                        | 6.41±0.27b                                                         |
| N2         | 25.32±0.73a                                                          | 0.73±0.07a                                                         | 293.50±5.62a                                         | 7.51±0.24a                                                         |
| S2         | 23.58±0.69ab                                                         | 0.54±0.05b                                                         | 280.78±6.63abc                                       | 5.97±0.24b                                                         |
| J2         | 20.00±0.32d                                                          | 0.43±0.03b                                                         | 288.85±6.54ab                                        | 6.13±0.23b                                                         |

**Table S11.** Effects of bio-organic fertilizer with nitrogen reduction on growth of the cabbage

| Treatment<br>s | Plant height<br>(cm) | Leaf length<br>(cm) | Leaf width<br>(cm) | Petiole<br>length (cm) | Petiole width<br>(cm) |
|----------------|----------------------|---------------------|--------------------|------------------------|-----------------------|
| CK             | 12.05±0.21d          | 11.18±0.22c         | 3.90±0.29b         | 7.15±0.89ab            | 2.13±0.18b            |
| T1             | 14.50±0.35bc         | 14.23±0.59a         | 5.10±0.04a         | 7.88±0.52b             | 2.68±0.06 a           |
| T2             | 14.05±0.31c          | 12.88±0.68b         | 4.33±0.23b         | 7.83±0.40b             | 2.50±0.07a            |
| N2             | 15.93±0.11a          | 14.83±0.50a         | 5.53±0.05a         | 8.98±0.42a             | 2.85±0.13a            |
| S2             | 15.48±0.23a          | 14.28±0.43a         | 5.15±0.11a         | 8.85±0.28a             | 2.80±0.13a            |
| J2             | 14.78±0.18b          | 13.20±0.50b         | 4.33±0.17b         | 8.20±0.97ab            | 2.58±0.14a            |

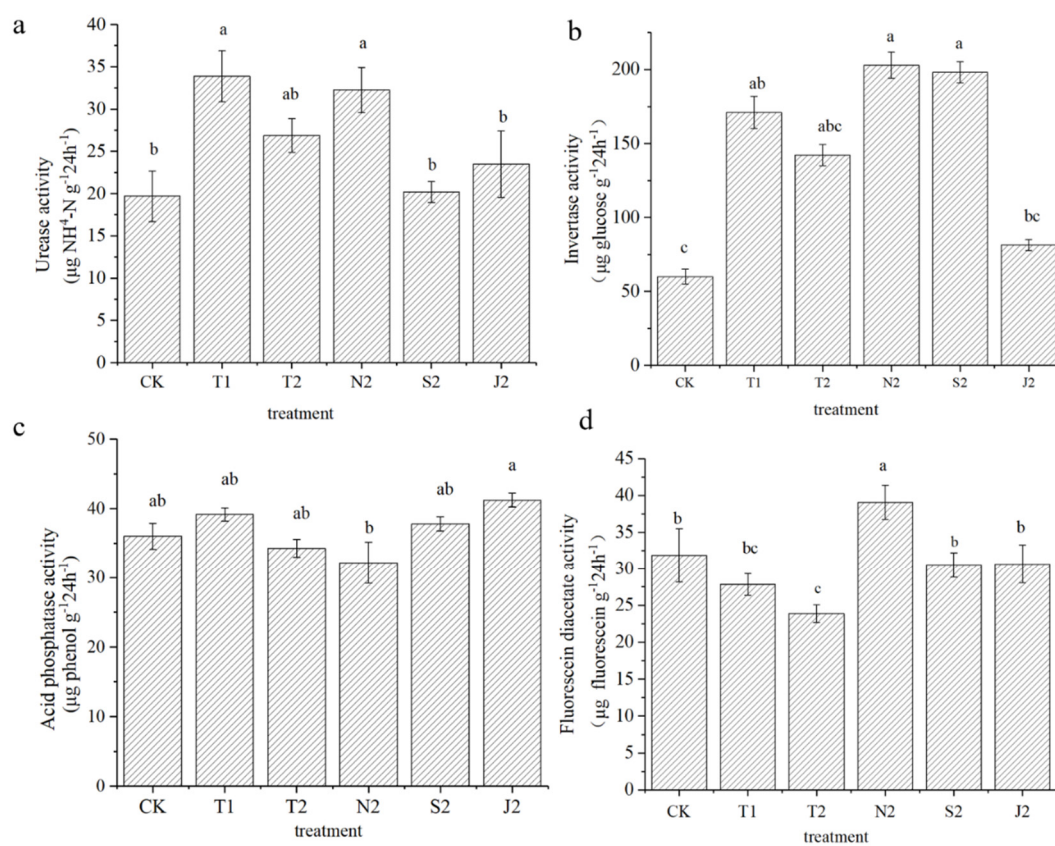

**Figure S1** Soil-enzyme activities at the root soil of cabbage under different fertilization treatments, **(a)** Urease activity; **(b)** Invertase activity; **(c)** Acid phosphatase activity; **(d)** Fluorescein diacetate activity.

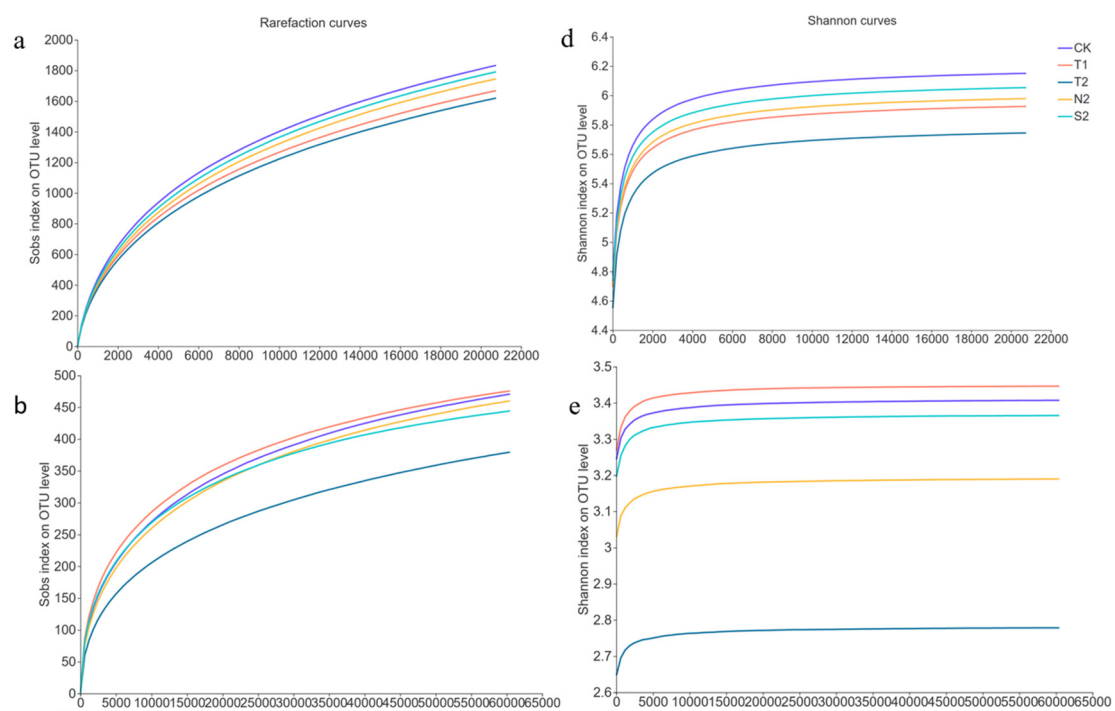

**Figure S2** Dilution curve of (a, d) bacteria, (b, e) fungi species abundance *Alpha* diversity index of soil samples



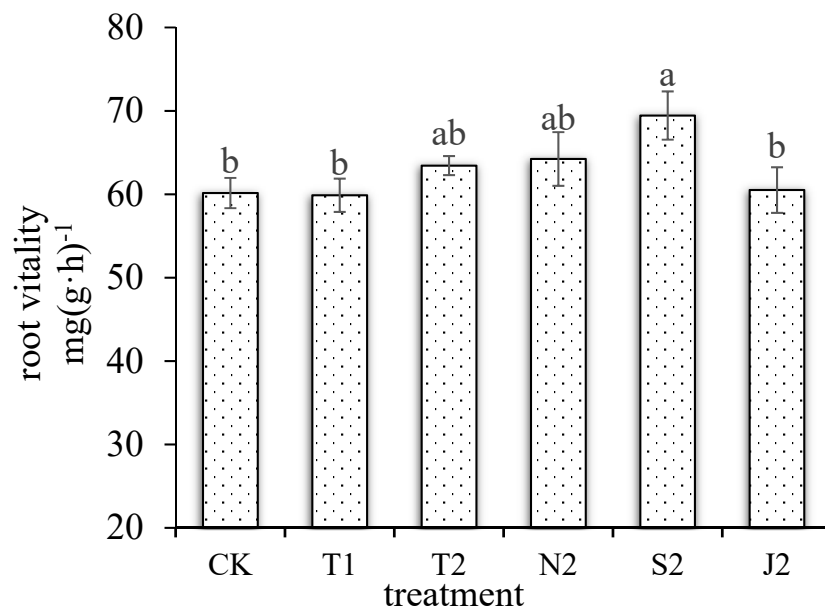

**Figure S3** Effects of bio-organic fertilizer with nitrogen reduction on root vitality

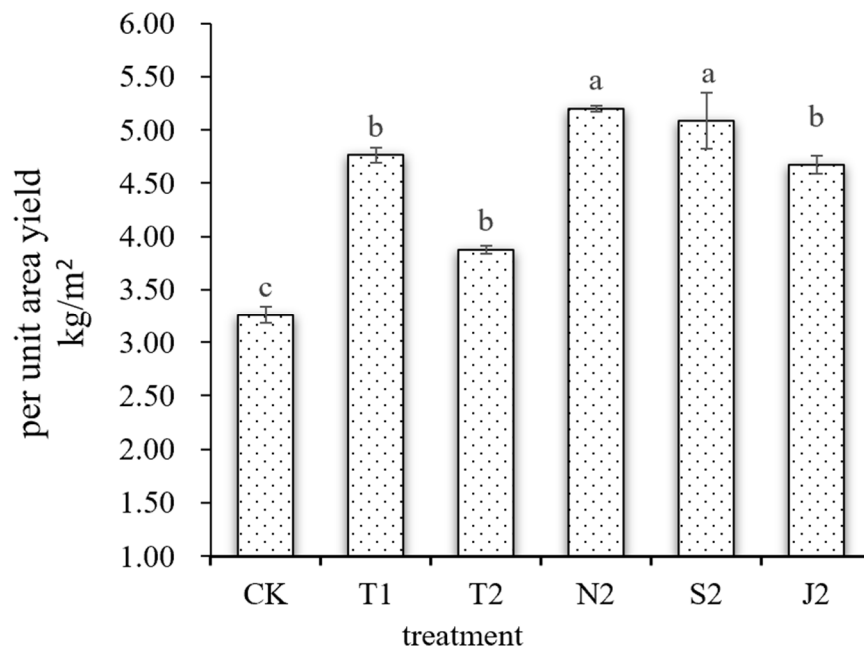

**Figure S4** Effects of bio-organic fertilizer with nitrogen reduction on yield of non-heading Chinese cabbage

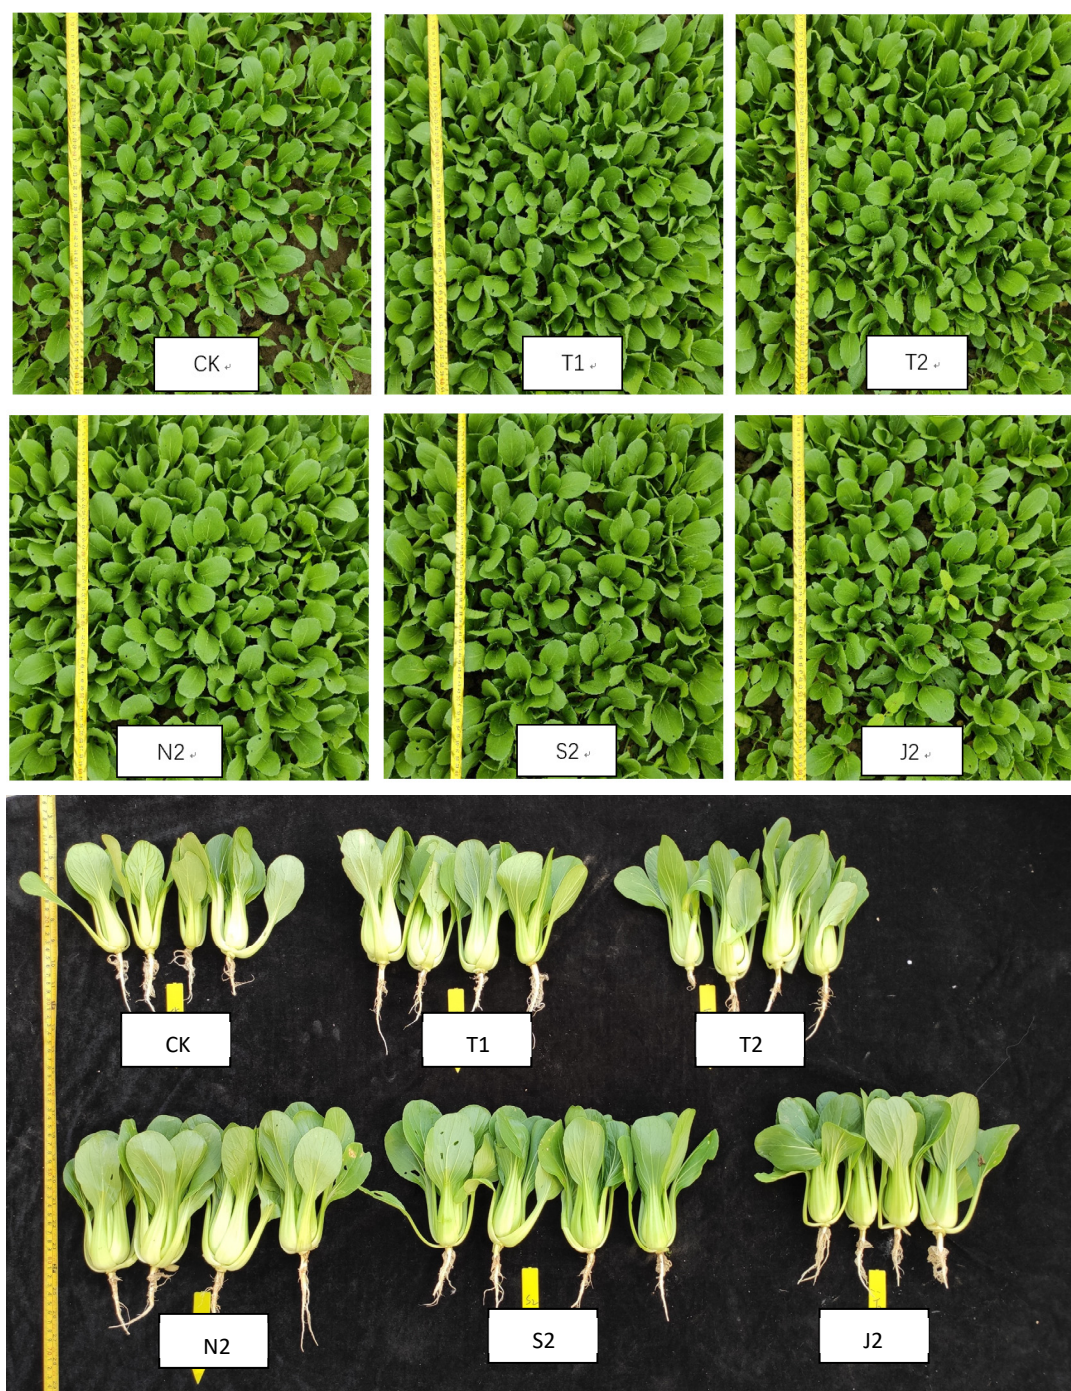

**Figure S5** Field growth status of non-nodular Chinese cabbage
